# Supplementary material
Source: Springer Nature journal article supplement (https://www.springermedizin.de/resource/supplementary/13002_2011_279_MOESM7_ESM.pdf/9627512)

Distance (Objective Function)

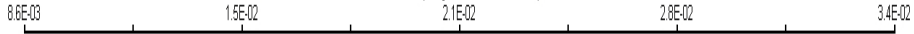

Information Remaining (%)

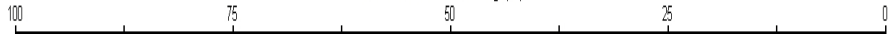

Lahu

Han

Akha

Dai

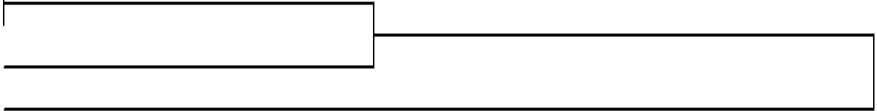

Supplement: MOESM7 [file 9627512]
